# Supplementary material for: Pretreatment Innate Cell Populations and CD4 T Cells in Blood Are Associated With Response to Immune Checkpoint Blockade in Melanoma Patients
Source: PubMed Central journal article supplement (PMC7076153; doi:10.3389/fimmu.2020.00372), 2020-03-10
Supplement: Data_Sheet_1.pdf [file Data_Sheet_1.pdf]

## Supplementary Material

**Supplementary table 1.** Characteristics of study participants.

| Variable                                | Responders                         | Primary resistance                 | Acquired resistance                |
|-----------------------------------------|------------------------------------|------------------------------------|------------------------------------|
| Number of patients                      | 13                                 | 19                                 | 10                                 |
| Number of samples collected at baseline | 10                                 | 17                                 | 9                                  |
| Number of samples collected at week6    | 11                                 | 19                                 | 9                                  |
| Number of samples collected at 1 year   | 2                                  | 10                                 | 6                                  |
| Treatment                               | Pembrolizumab=100%<br>Nivolumab=0% | Pembrolizumab=69%<br>Nivolumab=31% | Pembrolizumab=80%<br>Nivolumab=20% |
| Median age                              | 77(44-91)                          | 69(41-88)                          | 77(63-86)                          |
| Sex                                     |                                    |                                    |                                    |
| Male                                    | 7(54%)                             | 16(84%)                            | 8(80%)                             |
| Female                                  | 6(46%)                             | 3(16%)                             | 2(20%)                             |
| Mutation                                |                                    |                                    |                                    |
| WT                                      | 7(54%)                             | 7(37%)                             | 4(40%)                             |
| NRAS                                    | 5(38%)                             | 6(32%)                             | 4(40%)                             |
| BRAF                                    | 0(0%)                              | 4(21%)                             | 2(20%)                             |
| KRAS                                    | 0(0%)                              | 1(5%)                              | 0(0%)                              |
| KIT                                     | 1(8%)                              | 1(5%)                              | 0(0%)                              |
| M Staging at inclusion                  |                                    |                                    |                                    |
| M1a                                     | 0(0%)                              | 1(5%)                              | 2(20%)                             |
| M1b                                     | 5(38%)                             | 2(11%)                             | 5(50%)                             |
| M1c                                     | 5(38%)                             | 9(47%)                             | 0(0%)                              |
| M1d                                     | 1(8%)                              | 5(26%)                             | 0(0%)                              |
| IIIc                                    | 2(15%)                             | 2(11%)                             | 3(30%)                             |
| LDH at inclusion                        |                                    |                                    |                                    |
| Normal                                  | 11(85%)                            | 14(74%)                            | 10(100%)                           |
| Elevated                                | 2(15%)                             | 5(26%)                             | 0(0%)                              |

**Supplementary table 2.** The antibody panel used for mass cytometry phenotypic and functional analysis of immune cells in melanoma patients.

| <b>Metal label</b>             | <b>Specificity</b> | <b>Antibody clone</b> | <b>Manufacturer</b>        |
|--------------------------------|--------------------|-----------------------|----------------------------|
| <i>Barcoding and live/dead</i> |                    |                       |                            |
| 194Pt                          | Dead cells         | Cisplatin             |                            |
| 104Pd or 108Pd                 | CD45               | HI30                  | BD                         |
| <i>Surface stain</i>           |                    |                       |                            |
| 140Ce                          | Beads              | n/a                   |                            |
| 89Y                            | CD8A               | RPA-T8                | Biologend                  |
| 113In                          | CD56               | REA196                | Miltenyi Biotec            |
| 142Nd                          | CD19               | HIB19                 | BD                         |
| 143Nd                          | CD45RA             | HI100                 | BD                         |
| 144Nd                          | TCRgd              | B1                    | BD                         |
| 145Nd                          | CD4                | RPA-T4                | BD                         |
| 148Di                          | CD5                | HI10a                 | Biologend                  |
| 149Sm                          | TIM-3              | 7D3                   | BD                         |
| 150Nd                          | KLRG1              | SA231A2               | Biologend                  |
| 151Eu                          | CD39               | A1                    | Biologend                  |
| 152Gd                          | CD45RO             | UCHL1                 | BD                         |
| 154Gd                          | CD3                | UCHT1                 | BD                         |
| 155Gd                          | CXCR5              | RF8B2                 | BD                         |
| 156Gd                          | PD-1               | EH12.2H7              | Biologend                  |
| 159Tb                          | CCR7               | 150503                | R&D Systems                |
| 161Di                          | CD274              | MIH1                  | BD                         |
| 163Dy                          | CXCR3              | REA232                | Miltenyi Biotec            |
| 164Er                          | CTLA-4             | 14D3                  | eBioscience                |
| 165Di                          | CD16               | 3G8                   | BD                         |
| 166Er                          | TIGIT              | MBSA43                | eBioscience                |
| 167Di                          | CD27               | M-T271                | Biologend                  |
| 169Tm                          | CD25               | M-A251                | Biologend                  |
| 172Yb                          | CD38               | HIT2                  | BD                         |
| 173Yb                          | CD14               | M5E2                  | BD                         |
| 174Yb                          | HLA-DR             | L243                  | BD                         |
| 176Lu                          | CD127              | A019D5                | Biologend                  |
| <i>Intracellular stain</i>     |                    |                       |                            |
| 141Pr                          | TNF $\alpha$       | Mab11                 | Biologend                  |
| 146Nd                          | Eomes              | WD1928                | Life Technologies          |
| 153Eu                          | TOX                | TXRX10                | eBioscience                |
| 158Gd                          | IL-2               | MQ1-17H12             | BD                         |
| 160Gd                          | BCL-2              | BCL-2-100             | Life Technologies          |
| 162Er                          | FoxP3              | PCH101                | eBioscience                |
| 168Er                          | IFN $\gamma$       | B27                   | BD                         |
| 170Er                          | TCF1/TCF7          | C63D9                 | Cell Signalling Technology |
| 171Yb                          | Granzyme B         | GB11                  | Acris                      |
| 175Lu                          | Perforin           | dG9                   | Biologend                  |
| 209Bi                          | T-bet              | 4B10                  | BD                         |
| 115Di                          | Ki67               | B56                   | BD                         |

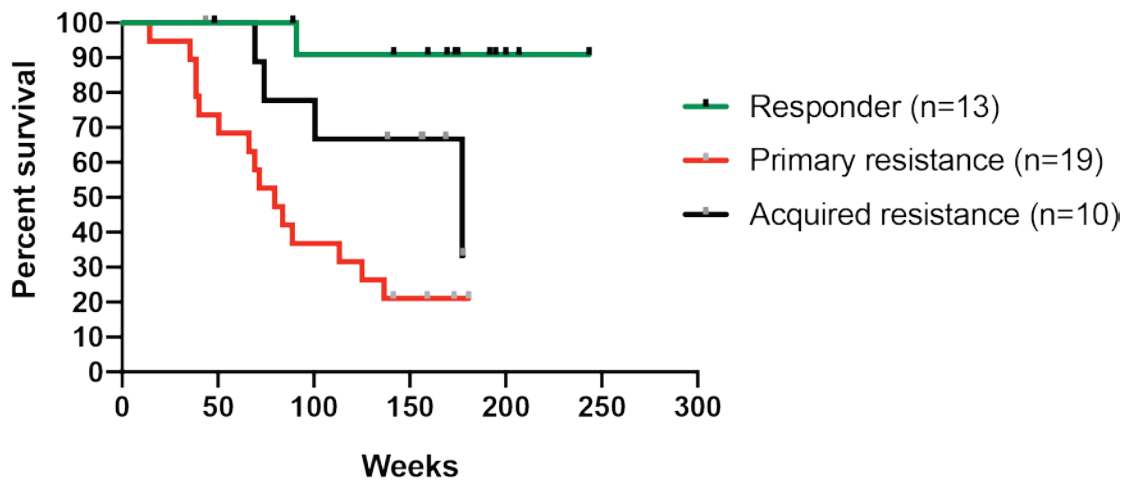

**Supplementary Figure 1.** Overall survival of melanoma patients categorized as responder vs primary and acquired resistance group. A Kaplan-Meier (KM) plot was generated comparing individual groups. Survival duration was calculated from the first treatment date to the last follow-up date. The median survival of primary resistance and acquired resistance group was 80 and 177 weeks respectively, and the median survival of the responder group was not reached as >50% of patients survived throughout the study period. Statistical analysis performed by the Mantel-Cox test gave a logrank p value of 0.0002.

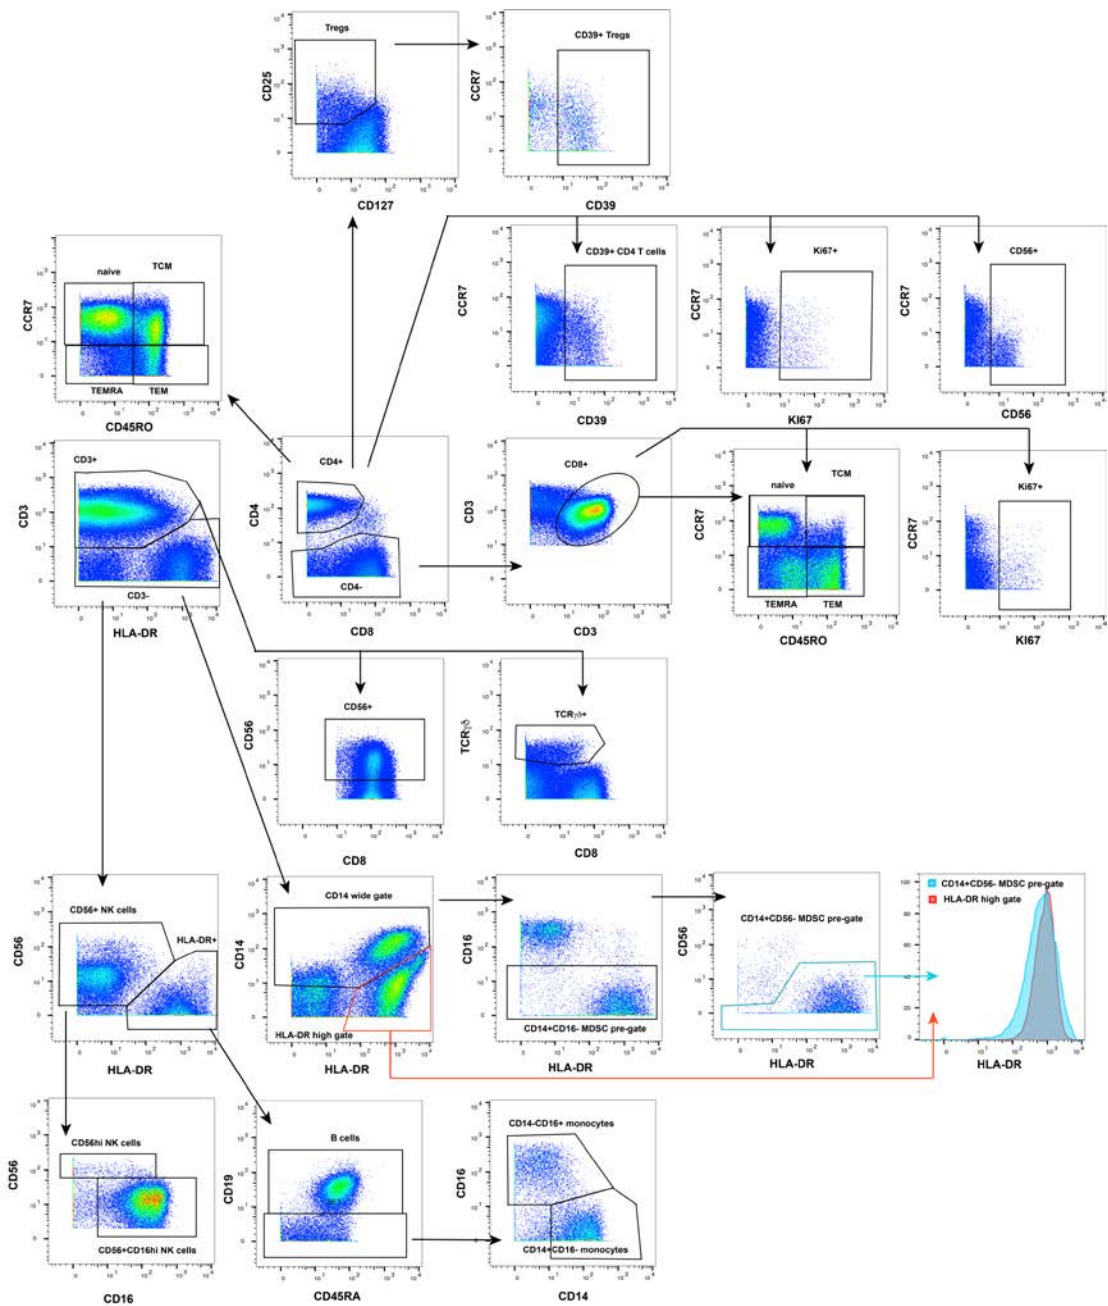

**Supplementary Figure 2.** Gating strategy for mass cytometry data. Prior to population analysis, cells were pre-gated as positive for DNA-intercalated events (detected on channel 191) and negative for EQ-beads (detected in channel 140), and with subsequent discrimination for exclusion of dead (cisplatin positive) cells and differential CD45 antibody staining to distinguish barcoded, concurrently analysed samples. Dotplots show a representative example of the gating strategy used to identify multiple lymphocyte lineages and subpopulations. For MDSC analysis, expression of HLA-DR by CD14<sup>+</sup> cells was compared with expression of HLA-DR by B cells. No HLA-DR-negative population was apparent and the magnitude of the left shift of CD14 vs B cells was not significantly different between any of the patient groups.

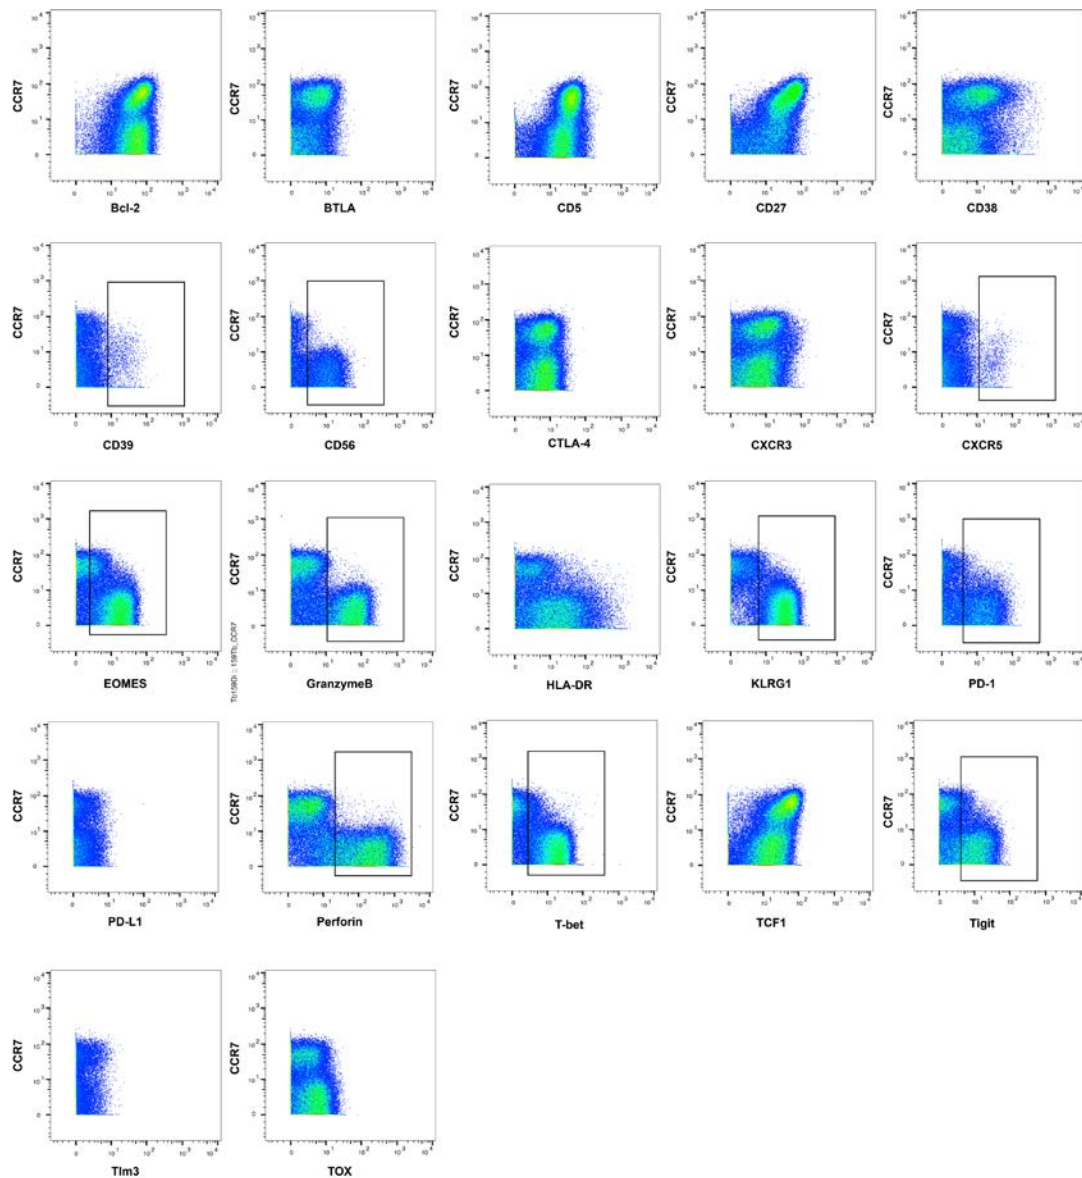

**Supplementary Figure 3.** Representative marker expression by CD8 T cells in the absence of stimulation. CD39, CD56 CXCR5, Eomes, GranzymeB, KLRG1, PD-1, Perforin, T-bet and Tigt were predominantly expressed by CCR7<sup>+</sup> cells and were readily gated, as were Ki67 and the CCR7/CD45RO populations shown in Supplementary Figure 2. Mean expression of Bcl-2, CD5, CD27, CD38, CXCR3, and TCF1 correlated with CCR7 but was not amenable to conventional gating. HLA-DR and TOX were negatively correlated with CCR7.

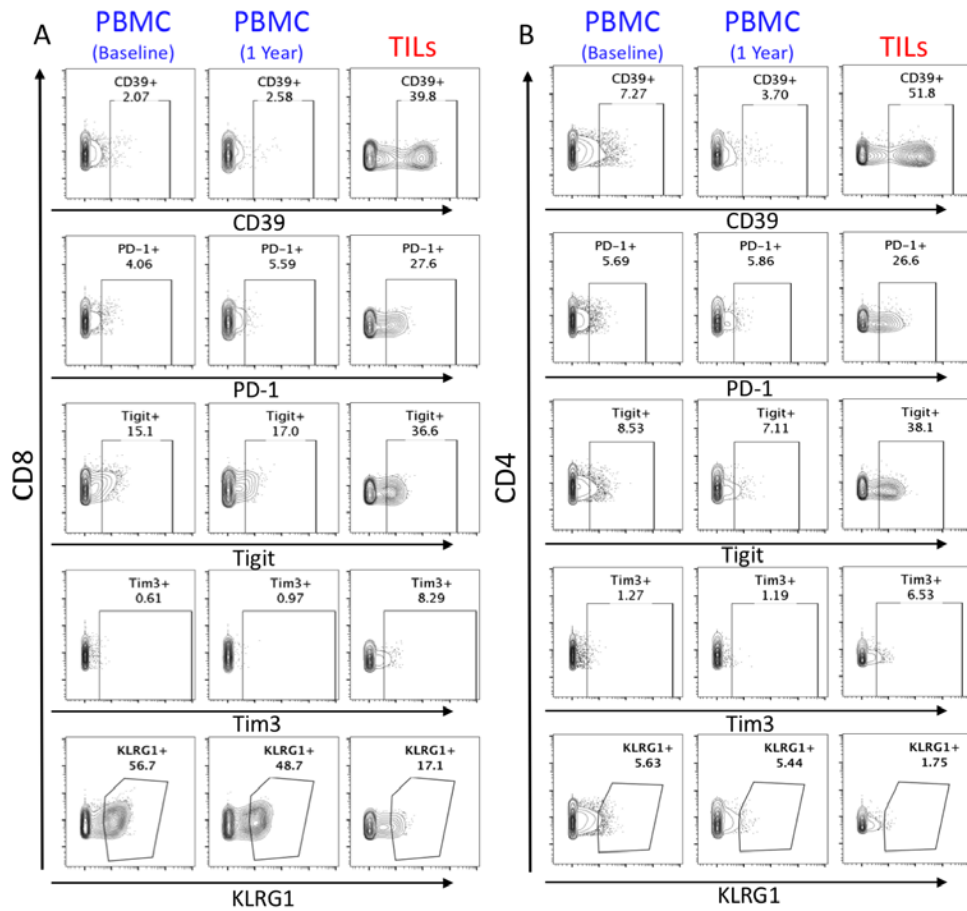

**Supplementary Figure 4.** TILs from metastatic melanoma tumor dissociates predominantly express checkpoint molecules CD39, TIGIT and PD-1 compared to PBMCs. (A) CD8 T cells and (B) CD4 T cells from a paired PBMC and TILs (13-month post treatment) were assessed for expression of various checkpoint molecules by CyTOF.

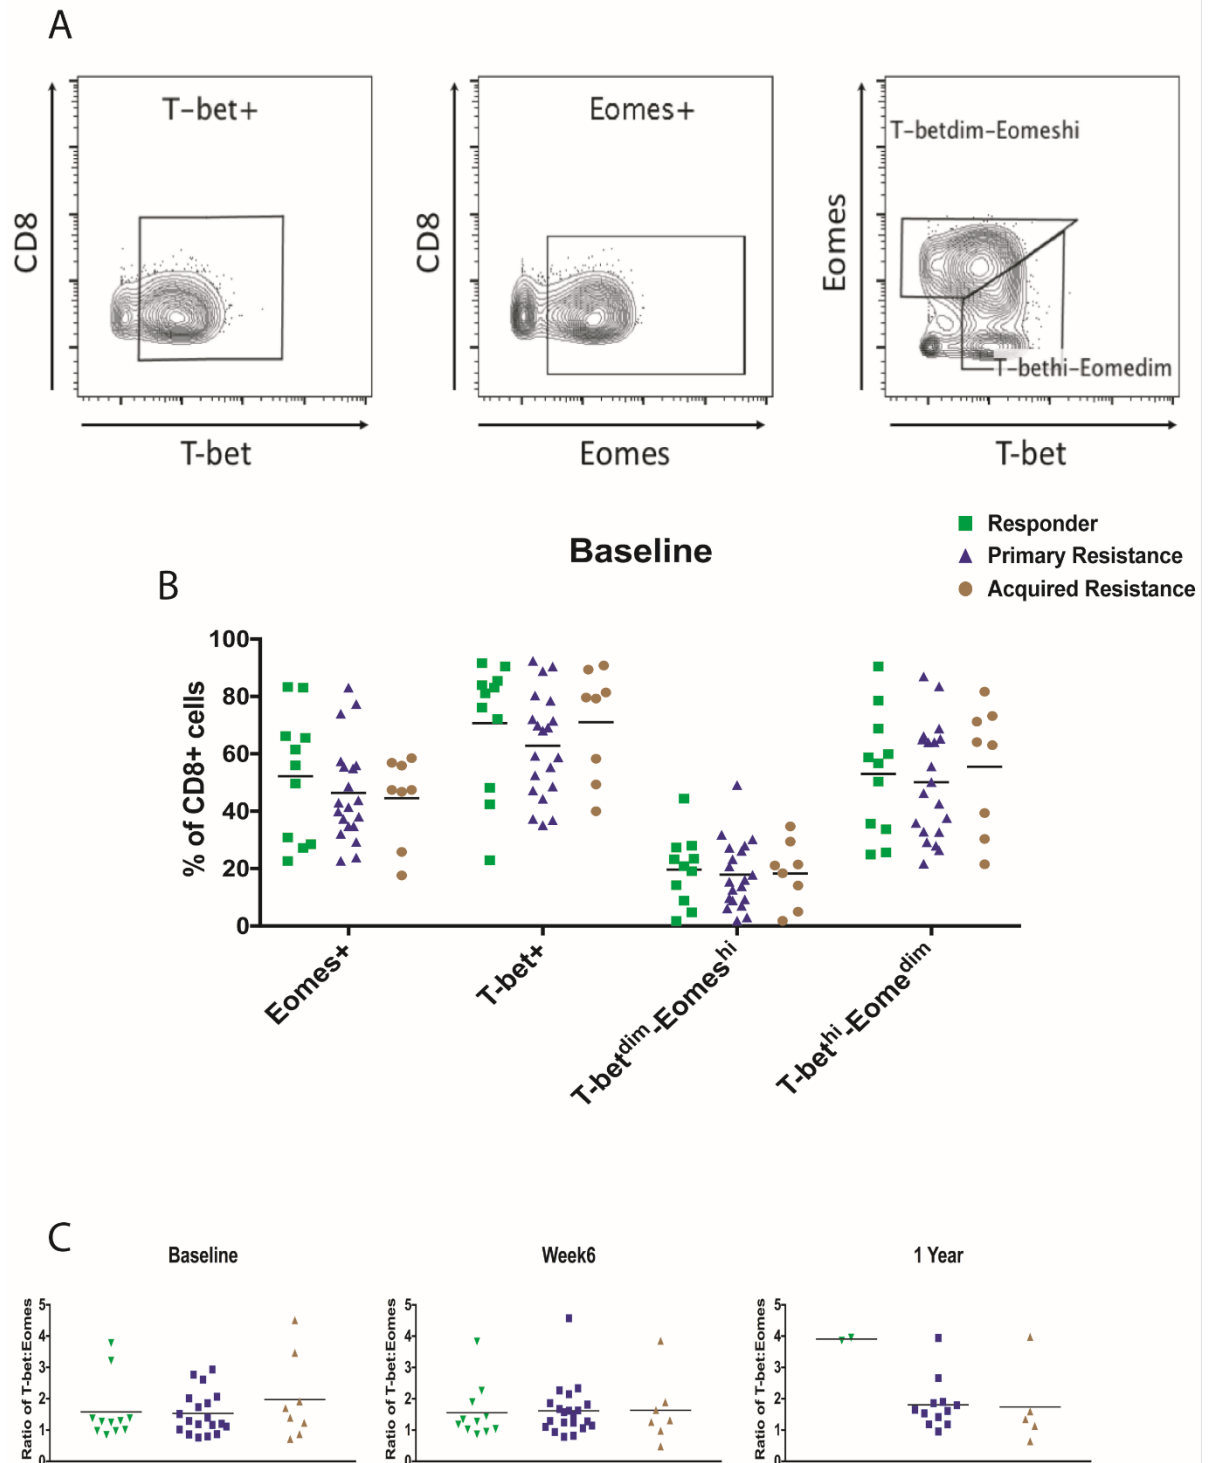

**Supplementary Figure 5.** Expression patterns of T-bet and Eomes within CD8 T cells. (A) Gating strategy to distinguish the T-bet and Eomes populations. (B) The percentage expression of T-bet and Eomes and co-expression of T-bet<sup>dim</sup>Eomes<sup>hi</sup> and T-bet<sup>hi</sup>Eomes<sup>dim</sup> on total CD8 T cells in melanoma patients prior to anti-PD-1 treatment. (C) Data showing the T-bet<sup>+</sup>: Eomes<sup>+</sup> CD<sup>+</sup> T cells ratio in responders (green) versus primary resistance (blue) and acquired resistance (brown).

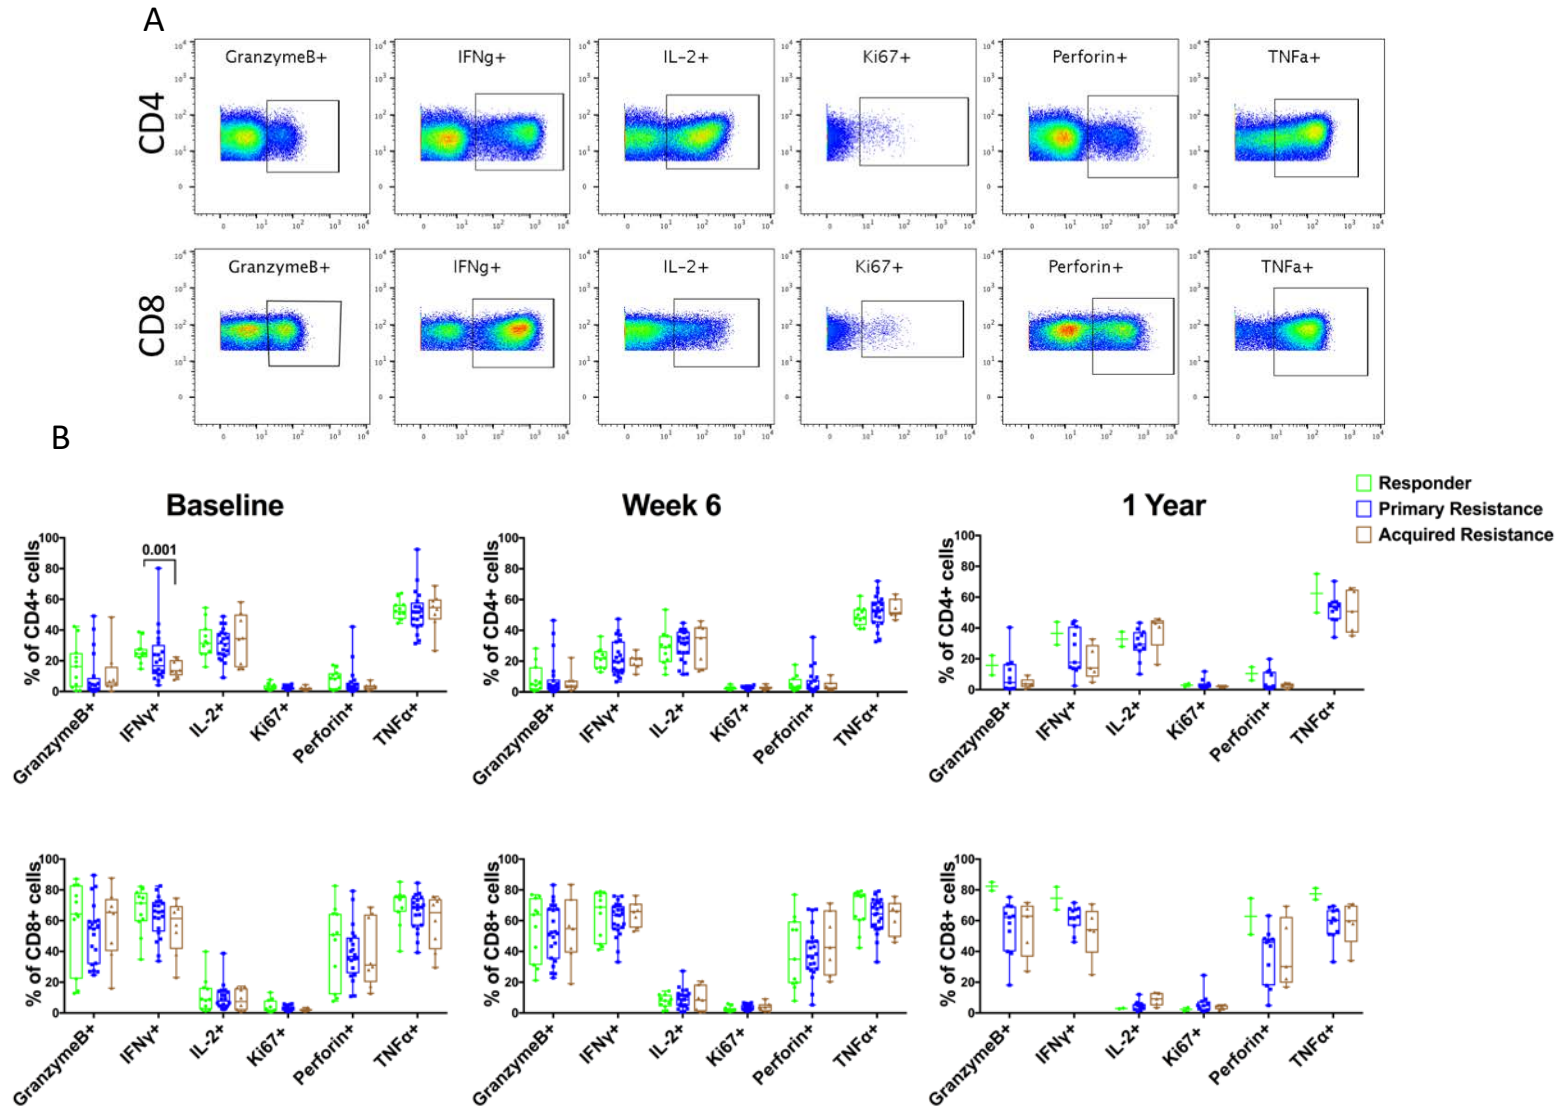

**Supplementary Figure 6.** Expression of cytotoxic effector proteins and cytokines in PMA and Ionomycin stimulated CD4 and CD8 T cells from patients with metastatic melanoma. (A) Representative CytoF plots displaying intracellular protein staining for GranzymeB, IFN $\gamma$ , IL-2, Ki-67, perforin and TNF $\alpha$  within CD4 and CD8 T cells. (B) Comparison of intracellular expression of GranzymeB, IFN $\gamma$ , IL-2, Ki-67, perforin and TNF $\alpha$  by stimulated CD4 and CD8+ T cells from responder, primary resistance and acquired resistance groups. Box plots indicate median and upper and lower quartiles; the whiskers indicate the 5th and 95th percentiles respectively.



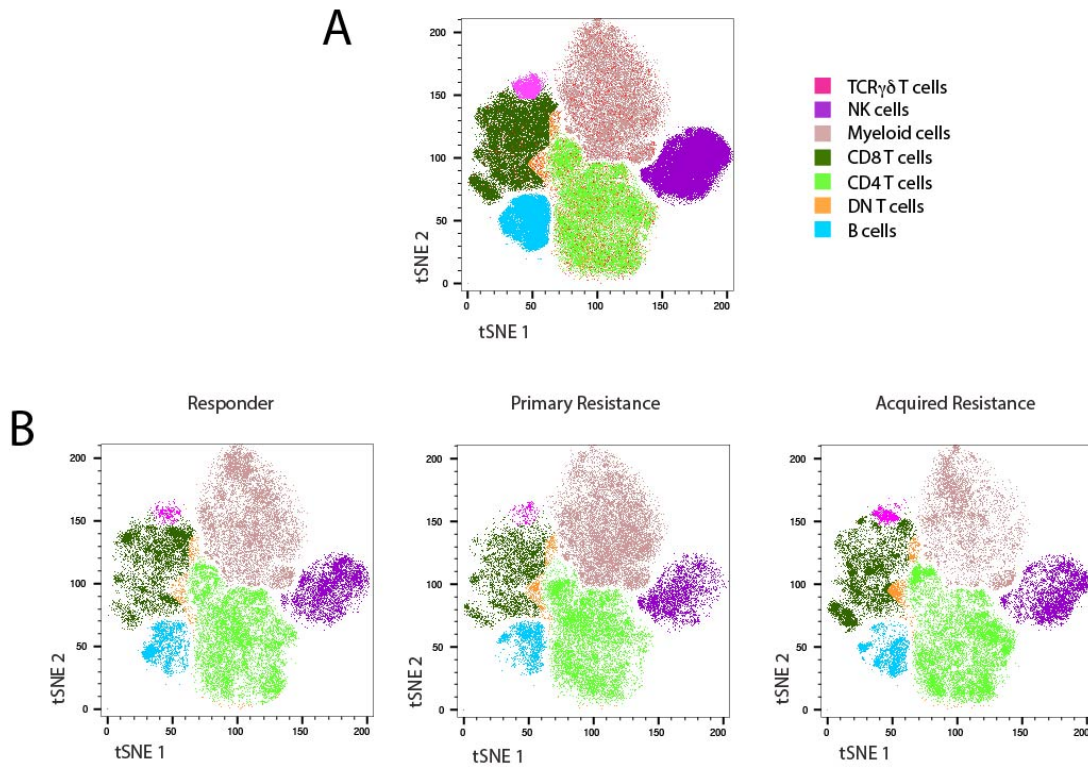

**Supplementary Figure 7.** t-SNE analysis of mass cytometry data from unstimulated samples. (A) A fixed number of events (1000) from each patient sample plus the batch controls were concatenated into a single file for t-SNE analysis. (B) Individual patient files were then identified within the t-SNE file and pooled into response groups that were downsampled to the minimum present in any group (22,000) so that each visualisation comprised the same number of events.

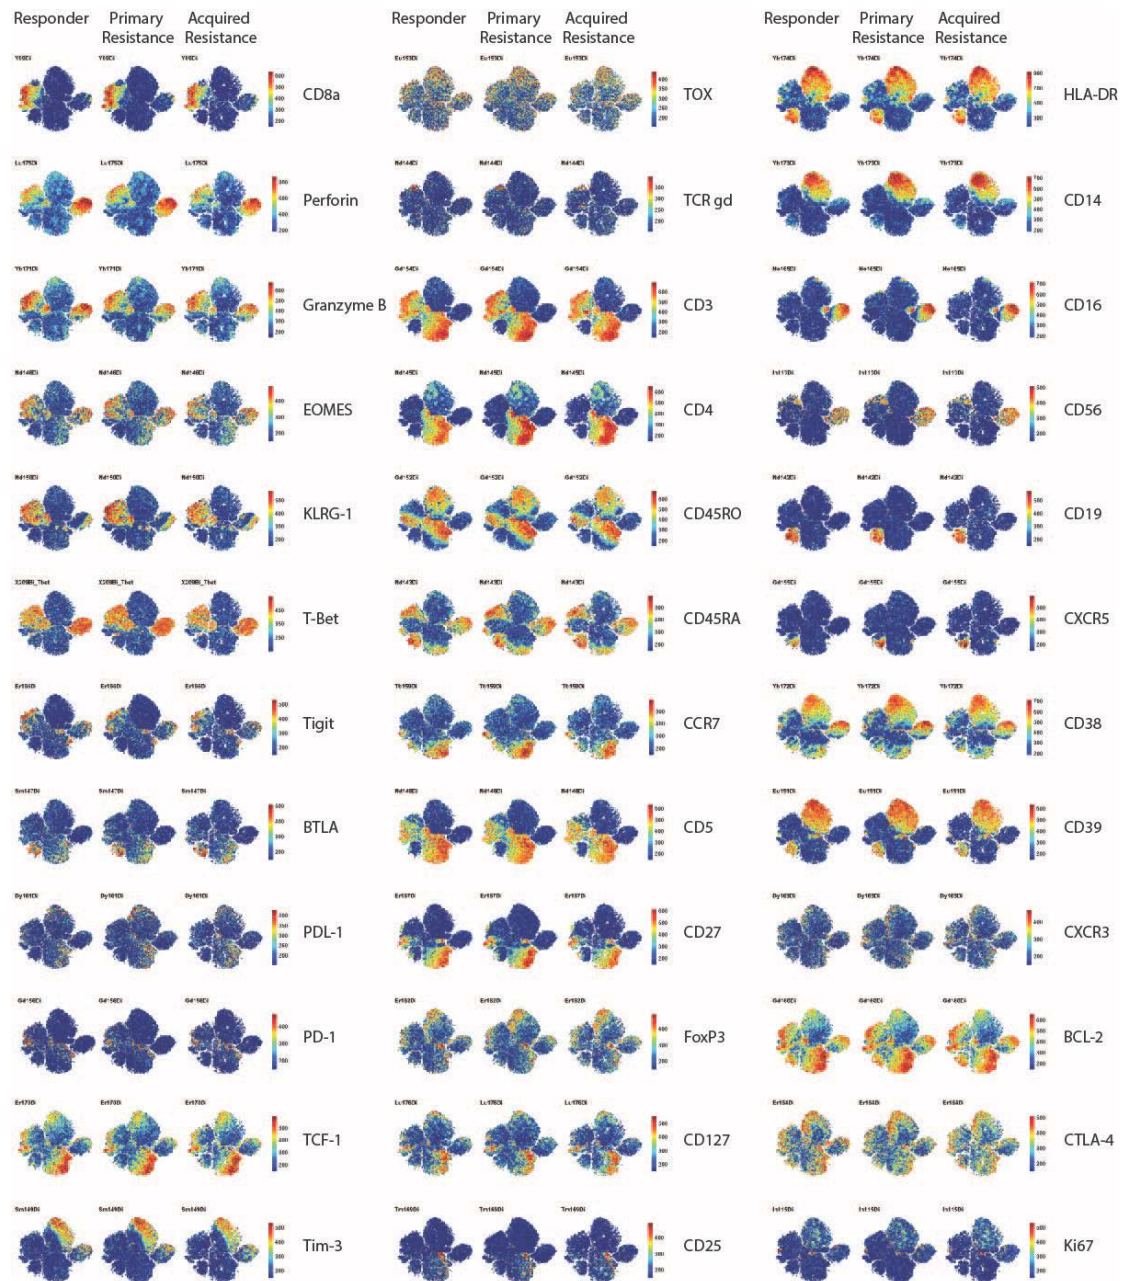

**Supplementary Figure 8.** Marker expression after t-SNE analysis of mass cytometry data from unstimulated samples. Expression of 36 markers in the pooled response group files shown in Supplementary Figure 7B.

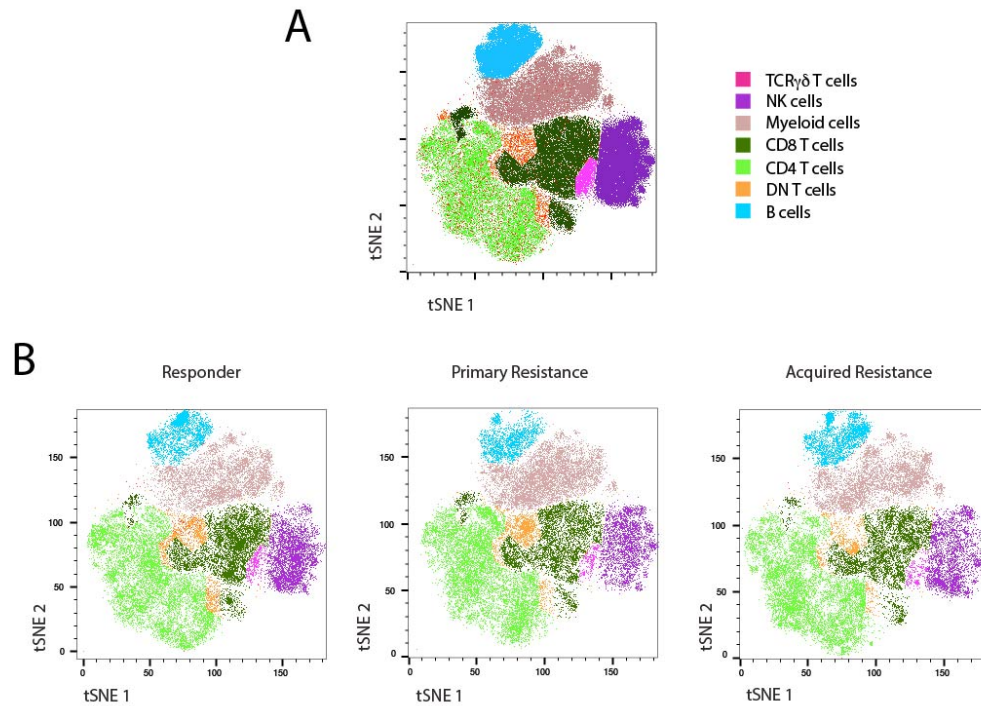

**Supplementary Figure 9.** t-SNE analysis of mass cytometry data from stimulated samples. (A) A fixed number of events (1000) from each patient sample plus the batch controls were concatenated into a single file for t-SNE analysis. (B) Individual patient files were then identified within the t-SNE file and pooled into response groups that were downsampled to the minimum present in any group (23,000) so that each visualisation comprised the same number of events.

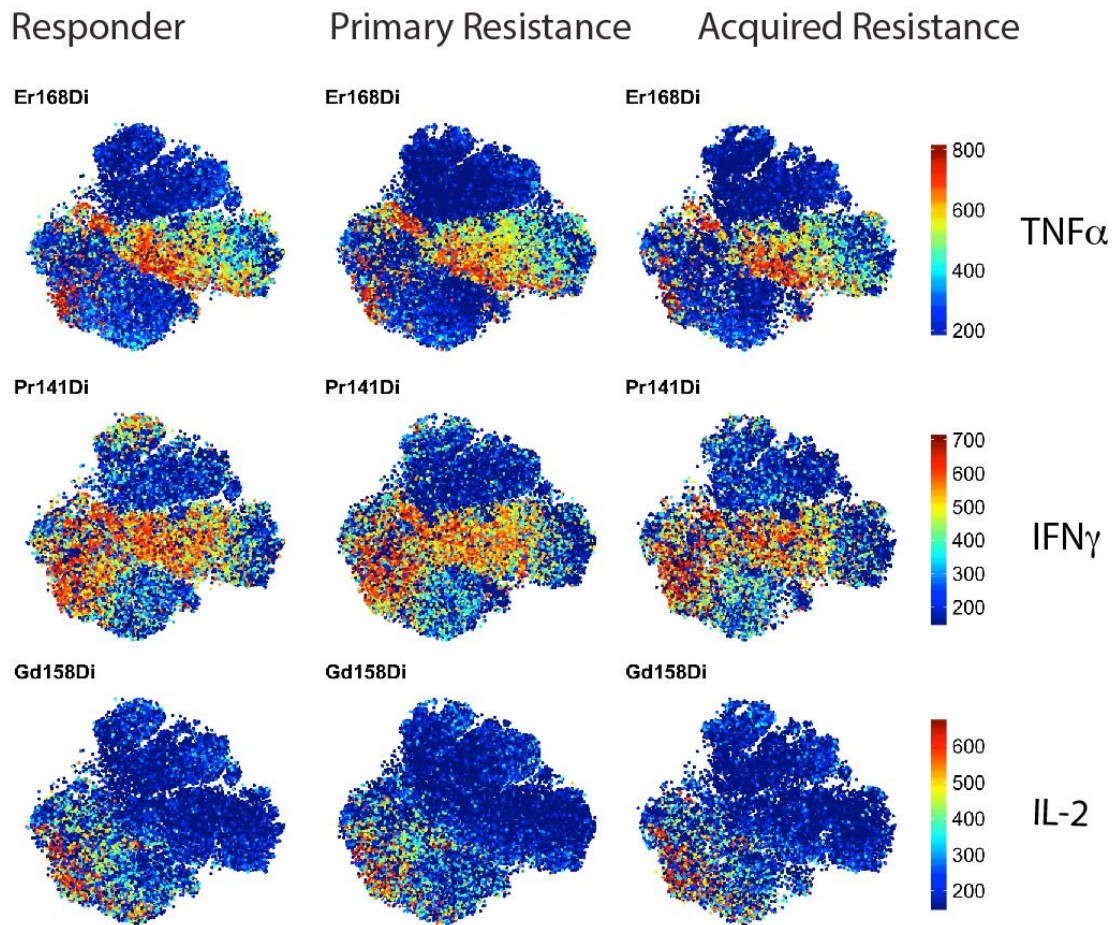

**Supplementary Figure 10.** Marker expression after t-SNE analysis of mass cytometry data from unstimulated samples. Expression of cytokines in the pooled response group files shown in Supplementary Figure 9.
